# Supplementary material for: Succinate Activates EMT in Intestinal Epithelial Cells through SUCNR1: A Novel Protagonist in Fistula Development
Source: Cells. 2020 Apr 29;9(5):1104. doi: 10.3390/cells9051104 (PMC7290938; doi:10.3390/cells9051104)
Supplement: Supplementary file 1 [file cells-09-01104-s001.pdf]

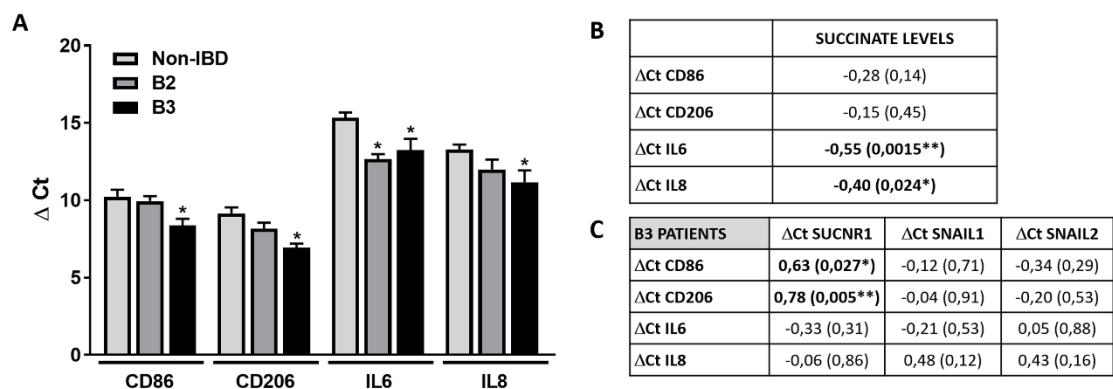

**Figure S1.** The expression of inflammatory mediators is increased in B3 Crohn's disease (CD) patients. (A) Graphs show the mRNA expression (in  $\Delta$ Ct) of macrophage markers (CD86 and CD206) and pro-inflammatory cytokines (IL6 and IL8) in intestinal resections from non-Inflammatory Bowel Disease (non-IBD), B2 and B3 Crohn's disease patients. In all cases, bars in graphs represent mean  $\pm$  SEM, and significant differences vs. the non-IBD group are shown by \* $p < 0.05$ . (B) Table with the values of the Spearman's correlation coefficient R and the corresponding  $p$ -value between data relative to the mRNA expression of CD86, CD206, IL6 and IL8 (expressed as delta Ct) and the levels of succinate on intestinal samples. The expression of IL6 and IL8 shows a positive and significant correlation with succinate levels. (C) Table with the values of the Spearman's correlation coefficient R and the corresponding  $p$ -value between data relative to the mRNA expression of CD86, CD206, IL6, IL8, SUCNR1, SNAIL1 and SNAIL2 (expressed as delta Ct) on intestinal samples from B3-CD patients. The expression of SUCNR1 shows a positive and significant correlation with that of CD86 and CD206.
